# Supplementary material for: Temperature dependence of the NO3 absorption cross-section above 298 K and determination of the equilibrium constant for NO3 + NO2↔ N2O5 at atmospherically relevant conditions
Source: Royal Society of Chemistry journal article supplement (doi:10.1039/b709193a), 2007-01-01
Supplement: b709193a.pdf [file b709193a.pdf]

## Supplemental Material Section

Table S1: Vibrational frequencies of  $\text{N}_2\text{O}_5$ .

Table S2:  $\Delta S^\circ_{\text{rxn}}(\text{T})$  for  $\text{NO}_2 + \text{NO}_3 \rightarrow \text{N}_2\text{O}_5$ .

Table S3:  $C_{p,\text{rxn}}(\text{T})$  for  $\text{NO}_2 + \text{NO}_3 \rightarrow \text{N}_2\text{O}_5$ .

Table S4:  $\Delta H^\circ_{\text{rxn}}(\text{T})$  for  $\text{NO}_2 + \text{NO}_3 \rightarrow \text{N}_2\text{O}_5$ .

Table S5:  $\Delta H^\circ_{\text{rxn}}(298\text{K})$  for  $\text{NO}_2 + \text{NO}_3 \rightarrow \text{N}_2\text{O}_5$ .

Table S6:  $\Delta H^\circ_{\text{f}}(\text{N}_2\text{O}_5, 298\text{K})$ .

Table S1: Vibrational frequencies (in  $\text{cm}^{-1}$ ) of  $\text{N}_2\text{O}_5$ . Only 10 of the 15 modes, some of which are internal rotations, have been assigned.

| <b>Obs.</b> | <b>G3</b>    | <b>MP2</b>     | <b>MP2</b>  | <b>DFT</b> | <b>MP2</b>   | <b>DFT</b>  | <b>DFT</b> | <b>DFT</b> | <b>NIST</b>  |
|-------------|--------------|----------------|-------------|------------|--------------|-------------|------------|------------|--------------|
|             | <b>MP2B3</b> | <b>6-311G*</b> | <b>DZ+P</b> |            | <b>6-31G</b> | <b>PW/P</b> | <b>VWN</b> | <b>B/P</b> | <b>JANAF</b> |
| 1           | 2            | 3              | 4           | 4          | 5            | 6           | 6          | 6          | 7            |
| 1720        | 1857         | 1879           | 1958        | 1725       | 1966         | 1764        | 1874       | 1785       | 1728         |
| 1720        | 1812         | 1861           | 1941        | 1679       | 1947         | 1716        | 1827       | 1738       | 1728         |
| 1338        | 1412         | 1303           | 1346        | 1315       | 1360         | 1344        | 1409       | 1354       | 1338         |
| 1246        | 1313         | 1224           | 1262        | 1222       | 1275         | 1249        | 1316       | 1261       | 1247         |
| 860         | 886          | 822            | 834         | 820        | 840          | 834         | 868        | 837        | 860          |
| ?           | 804          | 767            | 766         | 717        | 781          | 726         | 779        | 742        | 743          |
| 743         | 750          | 719            | 719         | 698        | 725          | 716         | 734        | 716        | 743          |
| ?           | 726          | 690            | 690         | 652        | 703          | 661         | 715        | 678        | 614          |
| 614         | 675          | 631            | 644         | 630        | 648          | 638         | 687        | 650        | 614          |
| 557         | 571          | 519            | 520         | 475        | 520          | 470         | 519        | 477        | 577          |
| 353         | 385          | 347            | 348         | 336        | 357          | 340         | 373        | 342        | 353          |
| ?           | 360          | 226            | 220         | 258        | 229          | 186         | 258        | 209        | 353          |
| ?           | 227          | 213            | 205         | 197        | 227          | 186         | 227        | 196        | 85           |
| 50          | 62           | 64             | 61          | 62         | 63           | 77          | 81         | 77         | 55*          |
| ?           | 48           | 18             | 42          | 48         | 34           | 51          | 64         | 55         | 8*           |

\* estimated

Table S2:  $\Delta S^\circ_{\text{rxn}}$  ( $\text{J mol}^{-1} \text{K}^{-1}$ ) calculated using frequencies in Table S1. NASA-JPL recommends  $-(143 \pm 8) \text{ J mol}^{-1} \text{K}^{-1}$ . Rotational constant of  $\text{N}_2\text{O}_5$  are from Ref. <sup>8</sup>. A correction of  $+1.95 \text{ J mol}^{-1} \text{K}^{-1}$  was applied for the anharmonicity of the internal rotors of  $\text{N}_2\text{O}_5$ .<sup>2</sup>

| T<br>(K) | G3MP2<br>B3 | MP2<br>6-311G* | MP2<br>DZ+P | DFT     | MP2<br>6-31G | DFT<br>PW/P | DFT<br>B/P | DFT<br>VWN | NIST<br>JANAF |
|----------|-------------|----------------|-------------|---------|--------------|-------------|------------|------------|---------------|
| Ref.     | 2           | 3              | 4           | 4       | 5            | 6           | 6          | 6          | 7             |
| 271.0    | -156.18     | -145.01        | -151.31     | -152.17 | -151.29      | -151.86     | -154.09    | -159.97    | -132.99       |
| 272.5    | -156.16     | -144.98        | -151.28     | -152.13 | -151.27      | -151.82     | -154.06    | -159.96    | -132.97       |
| 274.0    | -156.15     | -144.95        | -151.26     | -152.10 | -151.25      | -151.79     | -154.03    | -159.94    | -132.94       |
| 275.5    | -156.13     | -144.93        | -151.23     | -152.06 | -151.23      | -151.75     | -154.00    | -159.92    | -132.92       |
| 277.0    | -156.11     | -144.90        | -151.21     | -152.03 | -151.21      | -151.72     | -153.97    | -159.91    | -132.89       |
| 278.6    | -156.10     | -144.87        | -151.18     | -151.99 | -151.18      | -151.68     | -153.94    | -159.89    | -132.87       |
| 280.1    | -156.08     | -144.84        | -151.15     | -151.95 | -151.16      | -151.64     | -153.91    | -159.87    | -132.84       |
| 281.7    | -156.06     | -144.81        | -151.12     | -151.92 | -151.13      | -151.61     | -153.87    | -159.86    | -132.81       |
| 283.3    | -156.04     | -144.78        | -151.09     | -151.88 | -151.11      | -151.57     | -153.84    | -159.84    | -132.78       |
| 284.9    | -156.02     | -144.75        | -151.06     | -151.84 | -151.08      | -151.53     | -153.80    | -159.82    | -132.75       |
| 286.5    | -156.00     | -144.71        | -151.03     | -151.80 | -151.05      | -151.49     | -153.77    | -159.80    | -132.73       |
| 288.2    | -155.98     | -144.68        | -151.00     | -151.76 | -151.03      | -151.45     | -153.73    | -159.78    | -132.69       |
| 289.9    | -155.95     | -144.65        | -150.97     | -151.71 | -151.00      | -151.41     | -153.69    | -159.75    | -132.66       |
| 291.5    | -155.93     | -144.61        | -150.94     | -151.67 | -150.97      | -151.37     | -153.66    | -159.73    | -132.63       |
| 293.3    | -155.91     | -144.58        | -150.90     | -151.63 | -150.94      | -151.32     | -153.62    | -159.71    | -132.60       |
| 295.0    | -155.88     | -144.54        | -150.87     | -151.58 | -150.91      | -151.28     | -153.58    | -159.69    | -132.56       |
| 296.7    | -155.86     | -144.50        | -150.83     | -151.54 | -150.88      | -151.23     | -153.54    | -159.66    | -132.53       |
| 298.5    | -155.83     | -144.46        | -150.80     | -151.49 | -150.85      | -151.19     | -153.50    | -159.64    | -132.49       |
| 278.1    | -156.10     | -144.88        | -151.19     | -152.00 | -151.19      | -151.69     | -153.95    | -159.90    | -132.88       |
| 298.2    | -155.84     | -144.47        | -150.80     | -151.50 | -150.85      | -151.20     | -153.50    | -159.64    | -132.50       |
| 308.2    | -155.68     | -144.25        | -150.59     | -151.23 | -150.66      | -150.93     | -153.27    | -159.49    | -132.29       |
| 314.8    | -155.57     | -144.10        | -150.45     | -151.05 | -150.53      | -150.76     | -153.11    | -159.39    | -132.15       |
| 321.5    | -155.45     | -143.94        | -150.30     | -150.87 | -150.40      | -150.58     | -152.94    | -159.28    | -132.00       |

Table S3:  $C_{p,rxn}$  ( $J mol^{-1} K^{-1}$ ) calculated using frequencies in Table S1.

| <b>T</b>    | <b>G3MP2</b> | <b>MP2</b>     | <b>MP2</b>  | <b>DFT</b> | <b>MP2</b>   | <b>DFT</b>  | <b>DFT</b> | <b>DFT</b> | <b>NIST</b>  |
|-------------|--------------|----------------|-------------|------------|--------------|-------------|------------|------------|--------------|
| <b>(K)</b>  | <b>B3</b>    | <b>6-311G*</b> | <b>DZ+P</b> |            | <b>6-31G</b> | <b>PW/P</b> | <b>B/P</b> | <b>VWN</b> | <b>JANAF</b> |
| <b>Ref.</b> | 2            | 3              | 4           | 4          | 5            | 6           | 6          | 6          | 7            |
| 271.0       | 2.65         | 4.79           | 4.52        | 6.10       | 3.84         | 6.13        | 5.37       | 2.63       | 4.30         |
| 272.5       | 2.76         | 4.89           | 4.61        | 6.20       | 3.93         | 6.22        | 5.47       | 2.72       | 4.40         |
| 274.0       | 2.86         | 4.98           | 4.71        | 6.30       | 4.02         | 6.31        | 5.56       | 2.82       | 4.50         |
| 275.5       | 2.97         | 5.08           | 4.80        | 6.40       | 4.12         | 6.40        | 5.65       | 2.91       | 4.60         |
| 277.0       | 3.07         | 5.18           | 4.89        | 6.50       | 4.21         | 6.49        | 5.74       | 3.01       | 4.70         |
| 278.6       | 3.19         | 5.28           | 4.98        | 6.60       | 4.31         | 6.59        | 5.84       | 3.11       | 4.80         |
| 280.1       | 3.29         | 5.37           | 5.07        | 6.70       | 4.40         | 6.68        | 5.93       | 3.20       | 4.90         |
| 281.7       | 3.40         | 5.47           | 5.17        | 6.80       | 4.49         | 6.77        | 6.02       | 3.30       | 5.00         |
| 283.3       | 3.51         | 5.56           | 5.26        | 6.90       | 4.59         | 6.86        | 6.11       | 3.39       | 5.10         |
| 284.9       | 3.61         | 5.66           | 5.35        | 7.00       | 4.68         | 6.95        | 6.21       | 3.49       | 5.20         |
| 286.5       | 3.72         | 5.76           | 5.44        | 7.10       | 4.77         | 7.04        | 6.30       | 3.58       | 5.30         |
| 288.2       | 3.83         | 5.86           | 5.54        | 7.20       | 4.87         | 7.13        | 6.39       | 3.68       | 5.41         |
| 289.9       | 3.94         | 5.96           | 5.63        | 7.30       | 4.96         | 7.23        | 6.49       | 3.78       | 5.51         |
| 291.5       | 4.05         | 6.05           | 5.72        | 7.40       | 5.05         | 7.31        | 6.58       | 3.88       | 5.61         |
| 293.3       | 4.16         | 6.15           | 5.82        | 7.50       | 5.15         | 7.41        | 6.68       | 3.98       | 5.71         |
| 295.0       | 4.27         | 6.25           | 5.91        | 7.60       | 5.25         | 7.50        | 6.77       | 4.07       | 5.82         |
| 296.7       | 4.37         | 6.34           | 6.00        | 7.70       | 5.34         | 7.59        | 6.86       | 4.17       | 5.91         |
| 298.5       | 4.48         | 6.44           | 6.09        | 7.80       | 5.43         | 7.68        | 6.95       | 4.27       | 6.02         |
| 278.1       | 3.15         | 5.24           | 4.95        | 6.57       | 4.28         | 6.56        | 5.81       | 3.08       | 4.77         |
| 298.2       | 4.47         | 6.43           | 6.08        | 7.78       | 5.42         | 7.67        | 6.94       | 4.25       | 6.00         |
| 308.2       | 5.06         | 6.96           | 6.58        | 8.32       | 5.93         | 8.17        | 7.44       | 4.78       | 6.56         |
| 314.8       | 5.43         | 7.29           | 6.89        | 8.66       | 6.25         | 8.48        | 7.76       | 5.11       | 6.91         |
| 321.5       | 5.80         | 7.61           | 7.20        | 8.99       | 6.56         | 8.78        | 8.07       | 5.43       | 7.25         |

Table S4:  $\Delta H^\circ_{\text{rxn}}$  (kJ mol<sup>-1</sup>) calculated using frequencies in Table S1.

| <b>T</b>    | <b>G3MP2</b> | <b>MP2</b>     | <b>MP2</b>  | <b>DFT</b> | <b>MP2</b>   | <b>DFT</b>  | <b>DFT</b> | <b>DFT</b> | <b>NIST</b>  |
|-------------|--------------|----------------|-------------|------------|--------------|-------------|------------|------------|--------------|
| <b>(K)</b>  | <b>B3</b>    | <b>6-311G*</b> | <b>DZ+P</b> |            | <b>6-31G</b> | <b>PW/P</b> | <b>B/P</b> | <b>VWN</b> | <b>JANAF</b> |
| <b>Ref.</b> | 2            | 3              | 4           | 4          | 5            | 6           | 6          | 6          | 7            |
| 271.0       | -96.5        | -93.4          | -95.1       | -95.4      | -95.1        | -95.3       | -95.9      | -97.5      | -90.2        |
| 272.5       | -97.0        | -94.0          | -95.7       | -95.9      | -95.7        | -95.8       | -96.4      | -98.0      | -90.7        |
| 274.0       | -96.6        | -93.5          | -95.2       | -95.4      | -95.2        | -95.4       | -96.0      | -97.6      | -90.2        |
| 275.5       | -96.8        | -93.7          | -95.4       | -95.6      | -95.4        | -95.6       | -96.2      | -97.8      | -90.4        |
| 277.0       | -97.2        | -94.1          | -95.8       | -96.1      | -95.8        | -96.0       | -96.6      | -98.2      | -90.8        |
| 278.6       | -97.4        | -94.3          | -96.0       | -96.2      | -96.0        | -96.2       | -96.8      | -98.4      | -90.9        |
| 280.1       | -97.4        | -94.3          | -96.1       | -96.3      | -96.1        | -96.2       | -96.8      | -98.5      | -90.9        |
| 281.7       | -97.4        | -94.3          | -96.0       | -96.3      | -96.0        | -96.2       | -96.8      | -98.5      | -90.9        |
| 283.3       | -97.8        | -94.6          | -96.4       | -96.7      | -96.4        | -96.6       | -97.2      | -98.9      | -91.2        |
| 284.9       | -97.1        | -93.9          | -95.7       | -95.9      | -95.7        | -95.8       | -96.5      | -98.2      | -90.5        |
| 286.5       | -97.3        | -94.1          | -95.9       | -96.1      | -95.9        | -96.0       | -96.7      | -98.4      | -90.7        |
| 288.2       | -97.2        | -93.9          | -95.8       | -96.0      | -95.8        | -95.9       | -96.5      | -98.3      | -90.5        |
| 289.9       | -97.0        | -93.7          | -95.6       | -95.8      | -95.6        | -95.7       | -96.4      | -98.1      | -90.3        |
| 291.5       | -97.1        | -93.8          | -95.7       | -95.9      | -95.7        | -95.8       | -96.5      | -98.2      | -90.3        |
| 293.3       | -97.0        | -93.7          | -95.5       | -95.7      | -95.5        | -95.6       | -96.3      | -98.1      | -90.2        |
| 295.0       | -97.3        | -93.9          | -95.8       | -96.0      | -95.8        | -95.9       | -96.6      | -98.4      | -90.4        |
| 296.7       | -97.5        | -94.1          | -96.0       | -96.2      | -96.0        | -96.1       | -96.8      | -98.6      | -90.5        |
| 298.5       | -96.8        | -93.4          | -95.3       | -95.5      | -95.3        | -95.4       | -96.1      | -97.9      | -89.8        |
| 278.1       | -97.2        | -94.1          | -95.8       | -96.0      | -95.8        | -95.9       | -96.6      | -98.2      | -90.7        |
| 298.2       | -97.4        | -94.0          | -95.9       | -96.1      | -95.9        | -96.0       | -96.7      | -98.5      | -90.4        |
| 308.2       | -97.6        | -94.0          | -96.0       | -96.2      | -96.0        | -96.1       | -96.8      | -98.7      | -90.4        |
| 314.8       | -97.5        | -93.9          | -95.9       | -96.1      | -96.0        | -96.0       | -96.8      | -98.7      | -90.2        |
| 321.5       | -97.6        | -93.9          | -96.0       | -96.2      | -96.0        | -96.1       | -96.8      | -98.9      | -90.1        |

Table S5:  $\Delta H^\circ_{\text{rxn}}(298\text{K})$  ( $\text{kJ mol}^{-1}$ ) calculated using frequencies in Table S1. NASA-JPL recommends  $-94.6 \text{ kJ mol}^{-1}$ ;<sup>9</sup> IUPAC recommends  $-95.6 \text{ kJ mol}^{-1}$ .<sup>10</sup>

| T<br>(K) | G3MP2<br>B3 | MP2<br>6-311G* | MP2<br>DZ+P | DFT   | MP2<br>6-31G | DFT<br>PW/P | DFT<br>B/P | DFT<br>VWN | NIST<br>JANAF |
|----------|-------------|----------------|-------------|-------|--------------|-------------|------------|------------|---------------|
| Ref.     | 2           | 3              | 4           | 4     | 5            | 6           | 6          | 6          | 7             |
| 271.0    | -96.6       | -93.6          | -95.3       | -95.6 | -95.3        | -95.5       | -96.1      | -97.6      | -90.3         |
| 272.5    | -97.1       | -94.1          | -95.8       | -96.1 | -95.8        | -96.0       | -96.6      | -98.1      | -90.8         |
| 274.0    | -96.6       | -93.6          | -95.3       | -95.6 | -95.3        | -95.5       | -96.1      | -97.7      | -90.3         |
| 275.5    | -96.9       | -93.8          | -95.5       | -95.8 | -95.5        | -95.7       | -96.3      | -97.9      | -90.5         |
| 277.0    | -97.3       | -94.2          | -96.0       | -96.2 | -95.9        | -96.1       | -96.7      | -98.3      | -90.9         |
| 278.6    | -97.5       | -94.4          | -96.1       | -96.4 | -96.1        | -96.3       | -96.9      | -98.5      | -91.0         |
| 280.1    | -97.5       | -94.4          | -96.2       | -96.4 | -96.1        | -96.3       | -96.9      | -98.6      | -91.0         |
| 281.7    | -97.5       | -94.4          | -96.1       | -96.4 | -96.1        | -96.3       | -96.9      | -98.6      | -91.0         |
| 283.3    | -97.9       | -94.7          | -96.5       | -96.8 | -96.5        | -96.7       | -97.3      | -99.0      | -91.3         |
| 284.9    | -97.1       | -94.0          | -95.8       | -96.0 | -95.7        | -95.9       | -96.5      | -98.2      | -90.5         |
| 286.5    | -97.4       | -94.2          | -96.0       | -96.2 | -96.0        | -96.1       | -96.8      | -98.5      | -90.7         |
| 288.2    | -97.2       | -94.0          | -95.8       | -96.1 | -95.8        | -96.0       | -96.6      | -98.3      | -90.5         |
| 289.9    | -97.0       | -93.8          | -95.6       | -95.8 | -95.6        | -95.8       | -96.4      | -98.1      | -90.3         |
| 291.5    | -97.2       | -93.9          | -95.7       | -95.9 | -95.7        | -95.8       | -96.5      | -98.3      | -90.4         |
| 293.3    | -97.0       | -93.7          | -95.6       | -95.8 | -95.6        | -95.7       | -96.4      | -98.1      | -90.2         |
| 295.0    | -97.3       | -94.0          | -95.8       | -96.0 | -95.8        | -95.9       | -96.6      | -98.4      | -90.4         |
| 296.7    | -97.5       | -94.1          | -96.0       | -96.2 | -96.0        | -96.1       | -96.8      | -98.6      | -90.6         |
| 298.5    | -96.8       | -93.4          | -95.3       | -95.5 | -95.3        | -95.4       | -96.1      | -97.9      | -89.8         |
| 278.1    | -97.2       | -94.2          | -95.9       | -96.2 | -95.9        | -96.1       | -96.7      | -98.3      | -90.8         |
| 298.2    | -97.4       | -94.0          | -95.9       | -96.1 | -95.9        | -96.0       | -96.7      | -98.5      | -90.4         |
| 308.2    | -97.5       | -94.0          | -95.9       | -96.1 | -96.0        | -96.0       | -96.8      | -98.7      | -90.3         |
| 314.8    | -97.5       | -93.8          | -95.8       | -96.0 | -95.9        | -95.9       | -96.6      | -98.7      | -90.1         |
| 321.5    | -97.5       | -93.8          | -95.8       | -96.0 | -95.9        | -95.9       | -96.6      | -98.7      | -89.9         |

Table S6:  $\Delta H_f^\circ(\text{N}_2\text{O}_5, 298\text{K})$  ( $\text{kJ mol}^{-1}$ ) calculated using  $\text{N}_2\text{O}_5$  frequencies in Table S1.

$\Delta H_f^\circ(\text{NO}_3+\text{NO}_2, 298\text{K})=(107.9\pm 1.9) \text{ kJ mol}^{-1}$ ; NASA/JPL recommends  $13.3 \text{ kJ mol}^{-1}$ .<sup>9</sup>

Neglecting the DFT/VWN<sup>6</sup> and NIST-JANAF<sup>7</sup> results,  $\Delta H_f^\circ(\text{N}_2\text{O}_5, 298\text{K})$  equals

$(12\pm 1) \text{ kJ mol}^{-1}$ .

|             | <b>G3MP2</b> | <b>MP2</b>     | <b>MP2</b>  | <b>DFT</b> | <b>MP2</b>   | <b>DFT</b>  | <b>DFT</b> | <b>DFT</b> | <b>NIST</b>  |
|-------------|--------------|----------------|-------------|------------|--------------|-------------|------------|------------|--------------|
|             | <b>B3</b>    | <b>6-311G*</b> | <b>DZ+P</b> |            | <b>6-31G</b> | <b>PW/P</b> | <b>B/P</b> | <b>VWN</b> | <b>JANAF</b> |
| <b>Ref.</b> | 2            | 3              | 4           | 4          | 5            | 6           | 6          | 6          | 7            |
| lab         | 10.5         | 13.9           | 12.0        | 11.8       | 12.0         | 11.9        | 11.2       | 9.3        | 17.6         |
| field       | 10.7         | 13.9           | 12.1        | 11.8       | 12.1         | 11.9        | 11.3       | 9.6        | 17.3         |

## References

- 1 M. E. Jacox, *J. Phys. Chem. Ref. Data*, 2003, **32**, 1-441.
- 2 R. Janoschek and J. Kalcher, *Z. Anorg. Allg. Chem.*, 2002, **628**, 2724-2730.
- 3 J. U. Grabow, A. M. Andrews, G. T. Fraser, K. K. Irikura, R. D. Suenram, F. J. Lovas and W. J. Lafferty, *J. Chem. Phys.*, 1996, **105**, 7249-7262.
- 4 L. Bencivenni, N. Sanna, L. SchriverMazzuoli and A. Schriver, *J. Chem. Phys.*, 1996, **104**, 7836-7846.
- 5 S. Parthiban, B. N. Raghunandan and R. Sumathi, *Theochem-J. Mol. Struct.*, 1996, **367**, 111-118.
- 6 A. Stirling, I. Papai, J. Mink and D. R. Salahub, *J. Chem. Phys.*, 1994, **100**, 2910-2923.
- 7 M. W. Chase, C. A. Davies, J. R. Downey, D. J. Frurip, R. A. McDonald and A. N. Syverud, *J. Phys. Chem. Ref. Data*, 1985, **14**, 927-1856.
- 8 J. M. Colmont, *J. Mol. Spectrosc.*, 1992, **155**, 11-17.
- 9 S. P. Sander, R. R. Friedl, A. R. Ravishankara, D. M. Golden, C. E. Kolb, M. J. Kurylo, M. J. Molina, G. K. Moortgat, H. Keller-Rudek, B. J. Finlayson-Pitts, P. H. Wine, R. E. Huie and V. L. Orkin, *Chemical Kinetics and Photochemical Data for Use in Atmospheric Studies, Evaluation Number 15*, NASA/JPL, Pasadena, CA, 2006.
- 10 IUPAC subcommittee on gas kinetic data evaluation - Data Sheet PNOx5, International Union of Pure and Applied Chemistry, Basel, Switzerland, 2001.
